# Supplementary material for: Novel chemiluminescent immunochromatographic assay using a dual-readout signal probe for multiplexed detection of pesticide residues
Source: Royal Society of Chemistry journal article supplement (doi:10.1039/c8an00661j), 2018-01-01
Supplement: c8an00661j1.pdf [file c8an00661j1.pdf]

## **Electronic supplementary information**

### **Novel chemiluminescent immunochromatographic assay using dual-readout signal probe for multiplexed detection of pesticide residues**

Hui Ouyang, Mengli Liu, Wenwen Wang,\* Qi Shu, Zhifeng Fu\*

Key Laboratory of Luminescence and Real-Time Analytical Chemistry (Ministry of Education), College of Pharmaceutical Sciences, Southwest University, Chongqing 400716, China

E-mail addresses: wenwenwang2013@163.com (W. Wang), fuzf@swu.edu.cn (Z. Fu)

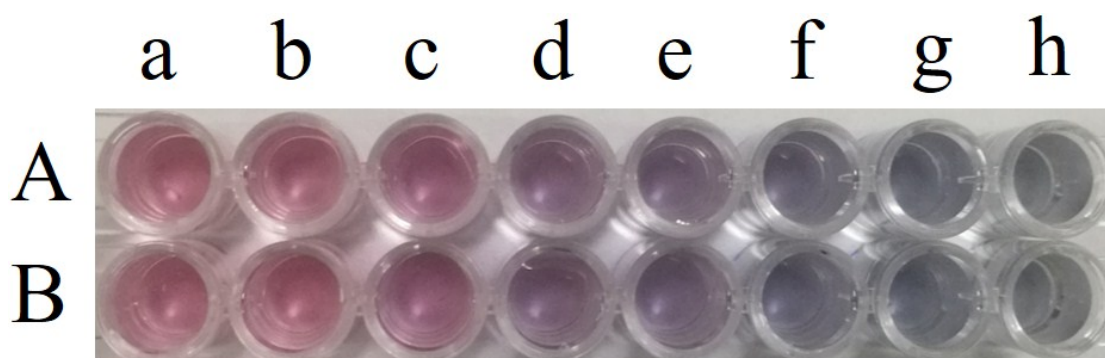

**Fig. S1.** (A) Photograph showing the color of the mixed solutions of 200  $\mu\text{L}$  of LRAuNPs, 70  $\mu\text{L}$  of 10% NaCl and 30  $\mu\text{L}$  of methyl parathion antibody at (a) 1.0, (b) 10, (c) 25, (d) 75, (e) 150, (f) 300 (g) 600 and (h) 1000  $\mu\text{g/mL}$ . (B) Photograph showing the color of the mixed solutions of 200  $\mu\text{L}$  of LRAuNPs, 70  $\mu\text{L}$  of 10% NaCl and 30  $\mu\text{L}$  of fenpropathrin antibody at (a) 1.0, (b) 10, (c) 25, (d) 75, (e) 150, (f) 300, (g) 500 and (h) 1000  $\mu\text{g/mL}$ .

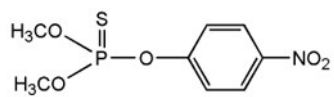

Methyl parathion

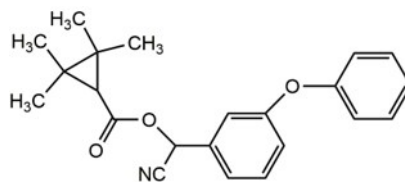

Fenpropathrin

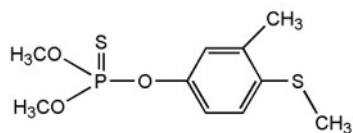

Fenthion

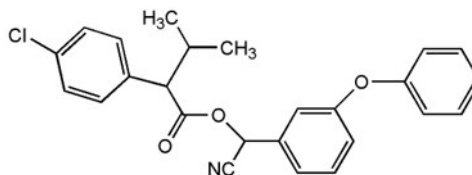

Fenvalerate

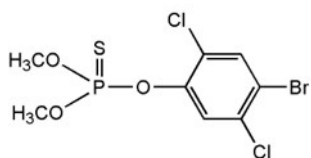

Methyl bromophos

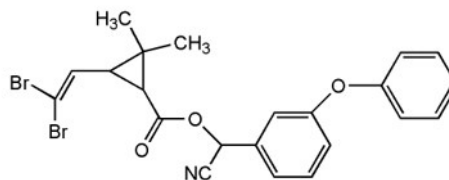

Deltamethrin

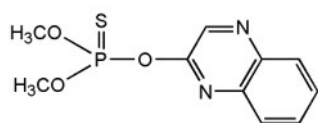

Quinalphos

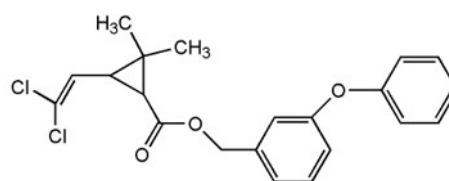

Permethrin

**Fig. S2.** The chemical structures of 8 pesticides.

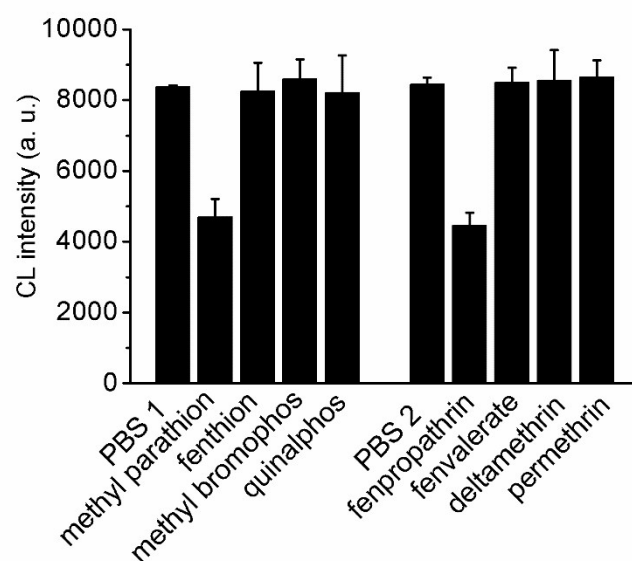

**Fig. S3.** CL signals of the proposed ICA protocol from PBS 1 and PBS 2 (as the blanks for methyl parathion and fenprothrin, respectively), methyl parathion, fenprothrin, methyl bromophos, quinalphos, fenprothrin, fenvalerate, deltamethrin and permethrin. The concentrations of all these pesticides were 100 ng/mL,  $n = 3$ .

**Table S1.** Comparison of analytical parameters of different methods for methyl parathion and fenpropathrin detections.

| Method                               | Analyte          | Detection range                    | LOD         | Reference              |
|--------------------------------------|------------------|------------------------------------|-------------|------------------------|
| Chemiluminescent ICA                 | methyl parathion | 0.1–250 ng/mL                      | 0.058 ng/mL | S1                     |
| Nonenzymatic electrochemical sensor  | methyl parathion | 10–500 ng/mL                       | 1.21 ng/mL  | S2                     |
| Tapered-fiber optic biosensor        | methyl parathion | 55.1–1.23×10 <sup>6</sup><br>ng/mL | 6.3 ng/mL   | S3                     |
| Imprinted polymers-based sensor      | methyl parathion | 263–2.29×10 <sup>4</sup><br>ng/mL  | 17.9 ng/mL  | S4                     |
| Liquid–liquid microextraction–HPLC   | methyl parathion | 58–500 ng/mL                       | 17 ng/mL    | S5                     |
| Solid-phase microextraction–HPLC     | fenpropathrin    | 1.5–1.25×10 <sup>3</sup> ng/g      | 0.5 ng/g    | S6                     |
| Gas chromatography                   | fenpropathrin    | 1.0–100 ng/g                       | 0.3 ng/g    | S7                     |
| Colorimetric immunochip assay        | methyl parathion | 2.63–108.68 ng/mL                  | 0.82 ng/mL  | S8                     |
|                                      | fenpropathrin    | 0.24–12.92 ng/mL                   | 0.13 ng/mL  |                        |
| Liquid–liquid microextraction–HPLC   | fenpropathrin    | 2–500 ng/mL                        | 1.54 ng/mL  | S9                     |
| Gas chromatography–mass Spectrometry | fenpropathrin    | 10–1000 ng/g                       | 3 ng/g      | S10                    |
| Dual-response ICA strategy           | methyl parathion | 0.50–200 ng/mL                     | 0.17 ng/mL  | The proposed<br>method |
|                                      | fenpropathrin    | 0.30–200 ng/mL                     | 0.10 ng/mL  |                        |

## References

- S1 Q. Shu, L. Wang, H. Ouyang, W. Wang, F. Liu and Z. Fu, *Biosens. Bioelectron.*, 2017, **87**, 908–914.
- S2 X. Tian, L. Liu, Y. Li, C. Yang, Z. Zhou, Y. Nie and Y. Wang, *Sens. Actuators B*, 2018, **256**, 135–142.
- S3 M. Arjmand, H. Saghaififar, M. Alijanianzadeh and M. Soltanolkotabi, *Sens. Actuators B*, 2017, **249**, 523–532.
- S4 X. H. Lin, S. X. L. Aik, J. Angkasa, Q. Le, K. S. Chooi and S. F. Y. Li, *Sens. Actuators B*, 2018, **258**, 228–237.
- S5 V. D. Silva, V. Simão, A. N. Dias, J. S. Carletto and E. Carasek, *J. Sep. Sci.*, 2015, **38**, 1959–1968.
- S6 P. P. Vázquez, A. R. Mughari and M. M. Galera, *Anal. Chim. Acta*, 2008, **607**, 74–82.
- S7 S. Zhang, Q. Yang, X. Yang, W. Wang, Z. Li, L. Zhang, C. Wang and Z. Wang, *Talanta*, 2017, **166**, 46–53.
- S8 M. Lan, Y. Guo, Y. Zhao, Y. Liu, W. Gui and G. Zhu, *Anal. Chim. Acta*, 2016, **938**, 146–155.
- S9 L. Hu, P. Zhang, W. Shan, X. Wang, S. Li, W. Zhou and H. Gao, *Talanta*, 2015, **144**, 98–104.
- S10 Y. Qin, J. Zhang, Y. He, Y. Han, N. Zou, Y. Li, R. Chen, X. Li and C. Pan, *J. Agric. Food Chem.*, 2016, **64**, 6082–6090.
